## RESEARCH ARTICLE

# Intimate partner violence and its associated factors among reproductive-age women in East Africa:-A generalized mixed effect robust poisson regression model

Zemenu Tadesse Tessema<sup>1\*</sup>, Worku Misganaw Gebrie<sup>2</sup>, Getayeneh Antehunegn Tesema<sup>1</sup>, Tesfa Sewunet Alemneh<sup>1</sup>, Achamyeleh Birhanu Teshale<sup>1</sup>, Yigizie Yeshaw<sup>1,3</sup>, Adugnaw Zeleke Alem<sup>1</sup>, Hiwotie Getaneh Ayalew<sup>4</sup>, Alemneh Mekuriaw Liyew<sup>1</sup>

**1** Department of Epidemiology and Biostatistics, Institute of Public Health, College of Medicine and Health Sciences, University of Gondar, Gondar, Ethiopia, **2** Department of Physiology, School of Medicine, College of Medicine and Health Sciences, University of Gondar, Gondar, Ethiopia, **3** Department of Human Anatomy, University of Gondar, College of Medicine and Health Science, School of Medicine, Gondar, Ethiopia, **4** Department of Midwifery, School of Nursing and Midwifery, College of Medicine and Health Sciences, Wollo University, Dessie, Ethiopia

\* [zemenut1979@gmail.com](mailto:zemenut1979@gmail.com)

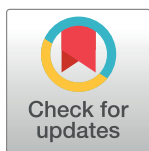

## OPEN ACCESS

**Citation:** Tessema ZT, Gebrie WM, Tesema GA, Alemneh TS, Teshale AB, Yeshaw Y, et al. (2023) Intimate partner violence and its associated factors among reproductive-age women in East Africa:-A generalized mixed effect robust poisson regression model. PLoS ONE 18(8): e0288917. <https://doi.org/10.1371/journal.pone.0288917>

**Editor:** Pintu Paul, Jawaharlal Nehru University, INDIA

**Received:** September 4, 2022

**Accepted:** June 23, 2023

**Published:** August 18, 2023

**Copyright:** © 2023 Tessema et al. This is an open access article distributed under the terms of the [Creative Commons Attribution License](https://creativecommons.org/licenses/by/4.0/), which permits unrestricted use, distribution, and reproduction in any medium, provided the original author and source are credited.

**Data Availability Statement:** Data used in this study were obtained from the DHS Program and available at [press@dhsprogram.com](mailto:press@dhsprogram.com), or <https://dhsprogram.com/data/available-datasets.cfm>.

**Funding:** The author(s) received no specific funding for this work.

**Competing interests:** The authors have declared that no competing interests exist.

## Abstract

### Background

The World Health Organization (WHO) has published estimates revealing that around one out of every three women across the globe has been a victim of either physical and/or sexual violence from an intimate partner or non-partner throughout their lifetime. The available evidence on intimate partner violence in East Africa is limited. Consequently, the objective of this study was to evaluate the occurrence and factors linked to intimate partner violence in East Africa.

### Methods

The study utilized the most recent data from the Demographic and Health Surveys (DHS) conducted between 2011 and 2018/19 in 11 countries in Eastern Africa. A total of 59,000 women were included in the study. Descriptive and inferential statistics were used to examine factors associated with IPV. A mixed effect robust Poisson regression model was fitted to identify factors associated with intimate partner violence. The adjusted prevalence ratio (aPR) and its corresponding 95% confidence interval (CI) were employed to determine the presence of a significant association between intimate partner violence and the independent variables.

### Results

In this study, the prevalence of intimate partner violence in East Africa was 43.72% with 95% CI 43.32% to 44.12%. In the mixed effect robust Poisson regression model:—Marital

**Abbreviations:** aPR, adjusted Prevalence ratio; CI, Confidence Interval; DHS, Demographic and Health Survey; IPV, Intimate Partner Violence; SDG, Sustainable Development Goal; uPR, unadjusted Prevalence Ratio; VIF, Variance Inflation Factor; WHO, World Health Organization.

status, working status, parity, sex of household headed, wealth index, community poverty, and residence, were significantly associated with intimate partner violence.

## Conclusion

The prevalence of intimate partner violence in East Africa is high as compared to the global prevalence 30%, which hinders The Sustainable Development Goals (SDGs), specifically goal 5, aim to attain gender equality and empower women and girls worldwide by the year 2030 Women being previously married and cohabitated, working, having a high number of children, rural residents were positively associated with IPV and household and community wealth index and sex of household headed were negatively related with IPV in East Africa. Therefore, we recommend establishing effective health and legal response using an integrated policy approach and Special attention should be given to women who live rural and poorest to reduce IPV and to achieve Sustainable Development Goals (SDGs) goal 5.

## Background

Intimate partner violence is prevalent among women and encompasses a range of abusive behaviors perpetrated by an intimate partner, such as physical, sexual, emotional abuse, and controlling actions [1]. Violence against women, including intimate partner violence and sexual violence, represents a significant public health issue and a violation of women's fundamental human rights [2]. According to estimates released by the World Health Organization (WHO), approximately one-third of women worldwide have experienced physical and/or sexual intimate partner violence or non-partner sexual violence at some point in their lives [3]. There is a huge inequalities in IPV 5% in developed countries and 40%. In Sub-Saharan Africa, the prevalence of IPV is 36% which exceeds the global magnitude 30% [3, 4]. Among ever-married or ever-partnered women aged 15 to 49 years in eastern Africa, a notable 38 percent reported experiencing physical or sexual abuse from their intimate partners [5].

Intimate partner violence adversely affects economic and social developments [5]. In addition, The impact of violence on women's health extends to their physical, mental, sexual, and reproductive well-being, and in certain contexts, it can heighten the risk of HIV transmission [2]. Also, IPV is linked to various mental health concerns, encompassing anxiety, depression, suicidal thoughts and behaviors, as well as posttraumatic stress disorders [6].

Despite, efforts had made to reduce IPV, major public health problem and needs extra effort to alleviate the problem. According to various studies done elsewhere, intimate partner violence is correlated with factor such as age [7–10], residence [7, 9–11], educational status [9, 11–13], income [7–13], sex of household headed [10] exposure to violence in childhood [14], marital status [7, 9], alcohol consumption [8, 15], duration of the relationship [15], substance use [13], social support [13], husband education [12], parity [12].

In spite of diminishing natural resources, inadequate infrastructure such as housing, schools, and health facilities, and rising unemployment rates, the majority of East African countries have yet to establish comprehensive demography and population policies to address intimate partner violence. This form of violence has significant short-term and long-term consequences on women's physical and mental well-being, and its adverse effects can extend to infants born to women who have experienced IPV. Only 14 East Africa countries had DHS

dataset of which 11 of them had DHS dataset between 2011 to 2018/19. As our search concerned there is no multicountry study on IPV using DHS dataset.

To the best of our knowledge, very limited studies conducted so far on intimate partner violence at the East Africa level that include multicountry among reproductive age women (15–49). Previous published articles used odds ratio (used when cases are rare) to report effect size for this particular study we reported prevalence ratio (directly compares the prevalence of a condition or outcome) using advanced statistical methods (**robust Poisson regression model**). Therefore, this study was conducted to fill this gap. This study seeks to examine the magnitude and factors associated with intimate partner violence in 11 East Africa countries among reproductive age women (15–49). The results of this study provide valuable insights into the challenges and barriers faced by the WHO East Africa region in achieving the Sustainable Development Goals (SDGs), specifically goal 5, which aims to promote gender equality and empower women and girls by 2030 [16].

## Methods

### Data source, study period, and population

The study utilized data from the most recent Demographic and Health Surveys (DHS) conducted between 2011 and 2018/19 in 11 countries across Eastern Africa. The DHS data sets are globally recognized as nationally representative and comparable surveys, employing standardized manuals, data collection methods, and variables across over 90 countries worldwide [17]. The Demographic and Health Surveys (DHS) collect comprehensive data, encompassing both self-reported and objective measures, in various domains such as reproductive health, fertility, child and maternal health, nutrition, mortality, and self-reported health behaviors among adults [18]. A total of 59,000 reproductive-age women with 98% response rate were included in this study. It includes women who had faced emotional or physical or sexual violence for the last 12 months preceding each country's survey.

### Measurement of variables

**Outcome variable.** The outcome variables used in this study were derived from a series of questions within the domestic violence module. These questions assessed various forms of violent acts experienced by women. Regarding physical violence, respondents were asked if their last partner had ever engaged in acts such as pushing, throwing objects, slapping, punching, kicking, strangling, burning, threatening with weapons, or twisting arms and pulling hair. Questions on emotional violence focused on whether the partner had ever humiliated, threatened, or insulted the respondent. Sexual violence inquiries involved whether the partner had physically forced the respondent into unwanted sex or other unwanted sexual acts, as well as instances where the respondent had been physically forced to engage in sexual acts she did not want to. Further details on the specific questions for each aspect of intimate partner violence can be found in previous studies

[18]. The survey asked women whether they had experienced any of the specified acts of physical, sexual, or emotional violence from their current or most recent husband/partner in the 12 months prior to the survey. Those who reported experiencing any of these acts were categorized as having experienced intimate partner violence (IPV), while those who did not report any such acts were considered as never having experienced IPV [19].

**Explanatory variables.** Based on known facts and literature [6, 7, 9, 15, 20–23] variables were included in this study. In this study, a range of individual and community-level factors were examined as independent variables. The individual-level factors included the age of respondents (grouped as 15–24, 25–34, and 35+), educational level (categorized as no

education, primary, and secondary/higher), husband/partner's educational level (classified as no education, primary, and secondary/higher), marital status (divided into currently married, cohabiting, and previously married), working status (grouped as not working and working), parity (divided into 0, 1–3, and 4+), and media exposure (categorized as yes or no).

The community variables considered in the study were the place of residence (classified as urban or rural), wealth index (categorized as low, middle, and high), and community-level education (classified as low, middle, and high).

**Operational definition.** *Household wealth index.* The wealth variable used in the analysis was derived from the household wealth index. The dataset categorized households into five quintiles: the lowest quintile (representing the poorest households), the second quintile (indicating poorer households), the third quintile (representing middle-income households), the fourth quintile (indicating richer households), and the fifth quintile (representing the wealthiest households) [18].

*Data analyses.* The 11 East Africa countries DHS data was first downloaded from the dhs program website. Since dhs program uses the same variables name and coding across all countries empirically reviewed variables were kept for analysis. Each country were given a code (Burundi = 1, Comoros = 2, Ethiopia = 3, Kenya = 4, Malawi = 5, Mozambique = 6, Rwanda = 7, Tanzania = 8, Uganda = 9, Zambia = 10, Zimbabwe = 11). The data was appended together to have a single dataset that represent East Africa region. Missing data with respect to the outcome variable were dropped.

To begin with, a descriptive analysis was conducted, utilizing frequency and percentage distributions to examine the characteristics of the participants across each variable outlined in [Table 1](#). Data extraction, cleaning, coding, and analysis were performed using STATA version 14 software (Stata Corp, College Station, Texas, USA). In all analyses, the women population sample weight (v005/1,000,000) was applied to address any over- and under-sampling issues. The "svy" command was used to consider the complex survey design and calculate robust standard errors. Additionally, to assess multicollinearity among the explanatory variables, the variance inflation factor (VIF) was examined, which indicated no evidence of collinearity among the independent variables. To calculate the weighted sample size, non-response and missing data were excluded. The pooled prevalence ratio of intimate partner violence (IPV) was estimated, and a modified Poisson regression model with mixed effects was employed to analyze the relationship between the explanatory variables and IPV. The prevalence ratio and 95%CI were used to measure the effect size. To declare the significant association between intimate partner violence and independent variables confidence interval was used.

## Results

A total of 59,000 women were included in the study. The largest population of the sample 20,606 (34.93%) of the respondents were age 35 and above, 15,437 (26.16%) of women had secondary education and above, from 59,000 women 16,886 (28.64%) of husband/partners had secondary school and above, 40,133 (68.02%) were currently married. A total of 38,149 (64.66%) had mass media exposure at household/community level. High number of study participants 7,737 (13.11%) were from Tanzania and the small number 1,933 (3.28%) were from Rwanda. A total of 43,569 (73.85%) of women resides in the urban area and 20,306 (34.42%) were from a middle wealth index. A total of 19,852 (33.65%) were from a community with a medium education level, and 19,374 (32.84%) were from a community with low socioeconomic status ([Table 1](#)).

Table 1. Individual &amp; household/community level characteristics of respondents.

| characteristics                                             | Weighted Frequency<br>(N = 59,000) | Weighted<br>Percentage | Women facing intimate partner violence(n = 25,797)<br>43.73% | p-value |  |
|-------------------------------------------------------------|------------------------------------|------------------------|--------------------------------------------------------------|---------|--|
| <b>Intimate partner violence</b>                            |                                    |                        |                                                              |         |  |
| No                                                          | 33203                              | 56.28                  | 56.28                                                        |         |  |
| Yes                                                         | 25797                              | 43.72                  | 43.72                                                        |         |  |
| <b>Age of respondent</b>                                    |                                    |                        |                                                              |         |  |
| 15–24                                                       | 14076                              | 23.51                  | 40.05                                                        | <0.001  |  |
| 25–34                                                       | 29487                              | 41.56                  | 44.66                                                        |         |  |
| 35 & above                                                  | 20606                              | 34.93                  | 44.78                                                        |         |  |
| <b>Women's level of education</b>                           |                                    |                        |                                                              |         |  |
| No Education                                                | 14076                              | 23.86                  | 41.36                                                        | <0.001  |  |
| Primary                                                     | 29486                              | 49.98                  | 47.68                                                        |         |  |
| Secondary/higher                                            | 15437                              | 26.16                  | 38.33                                                        |         |  |
| <b>Husband/Partner's level of education<br/>(n = 58977)</b> |                                    |                        |                                                              |         |  |
| No Education                                                | 19570                              | 33.18                  | 44.42                                                        | <0.001  |  |
| Primary                                                     | 22520                              | 38.18                  | 47.25                                                        |         |  |
| Secondary/higher                                            | 16887                              | 28.64                  | 38.26                                                        |         |  |
| <b>Marital status</b>                                       |                                    |                        |                                                              |         |  |
| Currently Married                                           | 40133                              | 68.02                  | 40.89                                                        | <0.001  |  |
| Cohabiting                                                  | 9789                               | 16.59                  | 45.11                                                        |         |  |
| Previously Married                                          | 9077                               | 15.39                  | 54.75                                                        |         |  |
| <b>Working status</b>                                       |                                    |                        |                                                              |         |  |
| Working                                                     | 38478                              | 65.22                  | 47.92                                                        | <0.001  |  |
| Not working                                                 | 20516                              | 34.78                  | 35.86                                                        |         |  |
| <b>Parity</b>                                               |                                    |                        |                                                              |         |  |
| 0                                                           | 3890                               | 6.65                   | 31.03                                                        | <0.001  |  |
| 1–3                                                         | 31855                              | 54.48                  | 42.65                                                        |         |  |
| 4 & above                                                   | 22725                              | 38.87                  | 47.93                                                        |         |  |
| <b>Exposure to media</b>                                    |                                    |                        |                                                              |         |  |
| Yes                                                         | 38149                              | 64.66                  | 44.35                                                        | <0.001  |  |
| No                                                          | 20851                              | 35.34                  | 42.57                                                        |         |  |
| <b>Sex of household head</b>                                |                                    |                        |                                                              |         |  |
| Male                                                        | 42568                              | 72.15                  | 43.21                                                        | <0.001  |  |
| Female                                                      | 16432                              | 27.85                  | 45.06                                                        |         |  |
| <b>Household/community level</b>                            |                                    |                        |                                                              |         |  |
| <b>Country</b>                                              |                                    |                        |                                                              |         |  |
| Burundi                                                     | 7647                               | 12.96                  | 50.62                                                        | <0.001  |  |
| Ethiopia                                                    | 5001                               | 8.48                   | 33.42                                                        |         |  |
| Kenya                                                       | 4334                               | 7.35                   | 46.79                                                        |         |  |
| Comoros                                                     | 2538                               | 4.30                   | 10.47                                                        |         |  |
| Malawi                                                      | 5415                               | 9.18                   | 42.12                                                        |         |  |
| Mozambique                                                  | 3596                               | 6.10                   | 22.43                                                        |         |  |
| Rwanda                                                      | 1933                               | 3.28                   | 40.21                                                        |         |  |
| Tanzania                                                    | 7737                               | 13.11                  | 49.05                                                        |         |  |
| Uganda                                                      | 7507                               | 12.72                  | 55.60                                                        |         |  |
| Zambia                                                      | 7372                               | 12.50                  | 46.71                                                        |         |  |
| Zimbabwe                                                    | 5916                               | 10.03                  | 45.33                                                        |         |  |
| <b>Place of residence</b>                                   |                                    |                        |                                                              |         |  |

(Continued)

Table 1. (Continued)

| characteristics                       | Weighted Frequency<br>(N = 59,000) | Weighted<br>Percentage | Women facing intimate partner violence(n = 25,797)<br>43.73% | p-value |
|---------------------------------------|------------------------------------|------------------------|--------------------------------------------------------------|---------|
| Urban                                 | 15431                              | 26.15                  | 41.16                                                        | <0.001  |
| Rural                                 | 43569                              | 73.85                  | 44.63                                                        |         |
| <b>Wealth index</b>                   |                                    |                        |                                                              |         |
| Poorest                               | 12578                              | 21.32                  | 47.30                                                        | <0.001  |
| Poorer                                | 11977                              | 20.30                  | 46.31                                                        |         |
| Middle                                | 11437                              | 19.39                  | 44.35                                                        |         |
| Richer                                | 11908                              | 20.18                  | 43.65                                                        |         |
| Richest                               | 11098                              | 18.81                  | 36.31                                                        |         |
| <b>Community education level</b>      |                                    |                        |                                                              |         |
| Low                                   | 20313                              | 34.43                  | 43.99                                                        | <0.001  |
| Medium                                | 19852                              | 33.65                  | 42.89                                                        |         |
| Medium                                | 18834                              | 31.92                  | 44.32                                                        |         |
| <b>Community socioeconomic status</b> |                                    |                        |                                                              |         |
| Low                                   | 19374                              | 32.84                  | 46.89                                                        | <0.001  |
| Medium                                | 20306                              | 34.42                  | 43.03                                                        |         |
| High                                  | 19320                              | 32.75                  | 41.28                                                        |         |

<https://doi.org/10.1371/journal.pone.0288917.t001>

### Prevalence of intimate partner violence in East Africa among reproductive-age women

Table 1 also presents the prevalence of intimate partner violence among reproductive-age women in East Africa. The prevalence of intimate partner violence was 43.73%. The highest IPV was recorded in Uganda 55.60% and the lowest IPV was recorded in Comoros 10.47%. The IPV prevalence was 47.30% from poorest women and 36.31% from richest women.

### Factors associated with intimate partner violence among reproductive-age women in Eastern Africa

Table 2 displays the adjusted prevalence ratios (PR) and corresponding 95% confidence intervals (CI) that illustrate the relationship between socio-demographic variables and intimate partner violence. The robust Poisson regression model identified marital status, working status, parity, place of residence, wealth index, sex of household head, and community poverty associated with the prevalence of intimate partner violence in Eastern Africa. The finding showed that the prevalence of intimate partner violence among cohabitation and previously married women were 12% (adjusted PR(aPR) = 1.12, 95%CI: 1.09, 1.15) and 53% (aPR = 1.53, 95%CI: 1.48, 1.59) higher prevalence respectively as compared to married women. The prevalence of intimate partner violence among women who had worked were 25% (aPR = 1.25, 95%CI: 1.22, 1.28) higher as compared to women who had no work. Regarding parity primiparous and multiparous women had 34% (aPR = 1.34, 95%CI: 1.28, 1.41) and 48% (aPR = 1.48, 95%CI: 1.40, 1.56) higher prevalence of intimate partner violence respectively, as compared to nulliparous women. The prevalence of intimate partner violence among women who reside in rural is 6% (aPR = 1.06, 95%CI: 1.01, 1.09) higher as compared to women who reside in urban. Wealth index is associated with IPV. As the better wealth index is associated with low prevalence ratio of IPV as compared to women of lowest wealth status as effected size indicated in Table 2. The prevalence of intimate partner violence among household headed women were lower by 10% (aPR = 0.90, 95%CI: 0.87, 0.92) as compared to male household-headed. The prevalence of

Table 2. Multivariable associations between socio-demographic factors and intimate partner violence in East Africa.

| Variables                                   | Intimate partner violence |       | Prevalence ratio (PR) |                  |
|---------------------------------------------|---------------------------|-------|-----------------------|------------------|
|                                             | No                        | Yes   | uPR(95%CI)            | aPR(95%CI)       |
| <b>Age of respondent</b>                    |                           |       |                       |                  |
| 15–24                                       | 8254                      | 5617  | 1                     | 1                |
| 25–34                                       | 13571                     | 10951 | 1.09(1.06,1.12)       | 1.02(0.99,1.05)  |
| 35 & above                                  | 11378                     | 9228  | 1.110(1.07,1.13)      | 0.98(0.95,1.01)  |
| <b>Women's level of education</b>           |                           |       |                       |                  |
| No Education                                | 8255                      | 5820  | 1                     | 1                |
| Primary                                     | 15424                     | 14059 | 1.17(1.13,1.20)       | 1.07(0.99,1.10)  |
| Secondary/higher                            | 9520                      | 5919  | 0.92(0.89,0.95)       | 1.01(0.97,1.05)  |
| <b>Husband/Partner's level of education</b> |                           |       |                       |                  |
| No Education                                | 10876                     | 8693  | 1                     | 1                |
| Primary                                     | 11879                     | 10640 | 1.07(1.04,1.09)       | 1.04(0.98,1.06)  |
| Secondary/higher                            | 10426                     | 6460  | 0.85(0.83,0.88)       | 1.06(0.99,1.08)  |
| <b>Marital status</b>                       |                           |       |                       |                  |
| Currently Married                           | 23721                     | 16411 | 1                     | 1                |
| Cohabiting                                  | 5373                      | 4415  | 1.14(1.11,1.18)       | 1.12(1.09,1.15)* |
| Previously Married                          | 4108                      | 4969  | 1.35(1.32,1.38)       | 1.53(1.48,1.59)* |
| <b>Working status</b>                       |                           |       |                       |                  |
| Not working                                 | 13158                     | 7357  | 1                     | 1                |
| Working                                     | 20041                     | 18436 | 1.34(1.31,1.37)       | 1.25(1.22,1.28)* |
| <b>Parity</b>                               |                           |       |                       |                  |
| 0                                           | 2683                      | 1207  | 1                     | 1                |
| 1–3                                         | 11267                     | 13587 | 1.40(1.33,1.47)       | 1.34(1.28,1.41)* |
| 4 & above                                   | 11833                     | 10891 | 1.56(1.49,1.64)       | 1.48(1.40,1.56)* |
| <b>Exposure to media</b>                    |                           |       |                       |                  |
| No                                          | 11975                     | 8875  | 1                     | 1                |
| Yes                                         | 21228                     | 16921 | 1.04(1.02,1.07)       | 1.02(0.96,1.04)  |
| <b>Place of residence</b>                   |                           |       |                       |                  |
| Urban                                       | 9079                      | 6352  | 1                     | 1                |
| Rural                                       | 24124                     | 19444 | 1.10(1.06,1.13)       | 1.06(1.01,1.09)* |
| <b>Wealth index</b>                         |                           |       |                       |                  |
| Poorest                                     | 6629                      | 5949  | 1                     |                  |
| Poorer                                      | 6430                      | 5547  | 1.00(0.97,1.03)       | 0.96(0.93,0.99)* |
| Middle                                      | 6364                      | 5072  | 0.95(0.91,0.98)       | 0.90(0.87,0.93)* |
| Richer                                      | 6710                      | 5198  | 0.92(0.88,0.95)       | 0.87(0.84,0.90)* |
| Richest                                     | 7068                      | 4029  | 0.76(0.73,0.79)       | 0.74(0.70,0.77)* |
| <b>Sex of household head</b>                |                           |       |                       |                  |
| Male                                        | 23724                     | 17609 | 1                     | 1                |
| Female                                      | 9314                      | 7390  | 1.02(1.01,1.06)       | 0.90(0.87,0.92)* |
| <b>Community education level</b>            |                           |       |                       |                  |
| Low                                         | 11378                     | 8935  | 1                     | 1                |
| Medium                                      | 11336                     | 8515  | 0.97(0.93,1.06)       | 1.00(0.97,1.04)  |
| High                                        | 10487                     | 8346  | 0.98(0.95,1.02)       | 1.03(0.99,1.06)  |
| <b>Community socioeconomic status</b>       |                           |       |                       |                  |
| Low                                         | 10290                     | 9083  | 1                     | 1                |
| Medium                                      | 11567                     | 8738  | 0.91(0.88,0.95)       | 0.95(0.92,0.98)* |

(Continued)

Table 2. (Continued)

| Variables | Intimate partner violence |      | Prevalence ratio(PR) |                  |
|-----------|---------------------------|------|----------------------|------------------|
|           | No                        | Yes  | uPR(95%CI)           | aPR(95%CI)       |
| High      | 11345                     | 7974 | 0.88(0.85,0.91)      | 0.93(0.90,0.96)* |

uPR = unadjusted Prevalence ratio, aPR = adjusted prevalence ratio

<https://doi.org/10.1371/journal.pone.0288917.t002>

intimate partner violence among women living communities with in middle and high level of poverty were lower by 5%(aPR = 0.95, 95%CI: 0.92, 0.98) and 7%(aPR = 0.93, 95%CI: 0.90, 0.96) respectively as compared to women in low community poverty.

## Discussion

The objective of this study is to evaluate the prevalence of intimate partner violence and identify the associated factors among women of reproductive age in East Africa. The study revealed a prevalence of 43.72% for intimate partner violence, with a 95% confidence interval ranging from 43.32% to 44.12%. This finding was lower than studies conducted in Uganda 55% [21], and higher studies done in sub-Saharan Africa 37% [24], Saudi Arabia 11.9% [14], Ethiopia 30% [9], DHS multicounty study 34.1% [11], Zimbabwe 40.9% [7], Gambia 40% [25], Benin 15.77% [26]. The difference in the magnitude might be due to the fact that this study was based on the East Africa countries pooled data analysis, which incorporates 11 East Africa countries. In addition, the discrepancy might be the study period difference, and the study population might be another reason. The potential explanation for the lower prevalence found in this study compared to previous studies conducted in Uganda could be attributed to the specific context of the study location. This study was conducted at two health clinics in northern Uganda, specifically in Gulu and Omoro districts, where the local population had experienced significant impacts from the conflict. The possible reason why lower studies sub-Saharan Africa is that the East Africa region faced different conflicts may result this variation.

In the mixed effect modified Poisson regression model, variables such as marital status, working status, parity, residence, sex of household headed, wealth index, and community poverty were significant variables associated with intimate partner violence among reproductive-age women in East Africa. Women who are living with cohabitation and previously married were associated with IPV. The findings of this study align with previous research, which has consistently shown that separated and divorced women have a significantly higher likelihood of experiencing intimate partner violence. Specifically, the likelihood for separated women was reported to be 30 times higher, while for divorced women, it was found to be 9 times higher compared to married women [27]. The possible might be women who are continuing their relationship with as cohabitating and previously married might be following equality principle with their partner for their expense whereas married women may enjoy a shared family income for their expense [28].

This study revealed that women working status is associated with IPV in East Africa among reproductive age women. This finding is consistent with other previous studies done elsewhere which indicated that women are engaged in any form of employment, the incidence of spousal abuse increases by 9.4% [29]. The possible reason might be if women pass their time working there may not have time for their partner and this might increase intimate partner violence against women. However, this finding contradicts studies done in Nigeria which reveals that women who was employed reduced the intimate partner violence than unemployed [30]. The discrepancy might be for our study if women engaged with work she may not have much time



for her partner this may result either types of violence. For Nigeria study if a women had no work she may dependent to here partner and economic dependency may be one cause of violence. If a women had her own income there may not be any fight between couples related to expenditure.

This study finding showed parity is associated with IPV in East Africa among reproductive age women. This finding is consistent with studies conducted elsewhere [31]. The possible reason might be the presence of the child may necessitate ongoing partner contact and if the number of children in the family increase the expenditure of the household increases including educational payment for students. In addition, women may not want to leave their matrimonial homes as they may tend to secure the welfare of their children [7].

Residence is associated with IPV. This finding is consistent with studies done in Bangladesh [10], Ethiopia [11, 32, 33], Kenya [34]. The possible reason might be urban areas are significantly less compliant to domestic violence since had a better educational level autonomous, and partners better educational level. However, this finding contradicts other previous studies conducted in Zimbabwe [7], which revealed that being a rural residence decreases the prevalence of intimate partner violence than urban women. The discrepancy might be sample size difference, population difference, and study period.

The sex of the household head is significantly associated with intimate partner violence. The possible reason might be if women are leading the household no one violates their right. This finding is supported by studies conducted in Tanzania [35]. However, some studies had observed the opposite scenario example studies done in Bangladesh being male household-headed decreases intimate partner violence [10], Iran [36]. The discrepancy might be the type of study design like the Iran article done using qualitative study while this study used cross-sectional study.

Individual-level income and community poverty were significantly associated with intimate partner violence. As the wealth status of a woman increases the prevalence of intimate partner violence decreases. This finding is consistent with studies conducted in Tanzania [35], Zimbabwe [31], Bangladesh [12], Myanmar [37], Ethiopia [6]. The possible reason might be women with better wealth status had fewer resource-related disputes and this leads to decreased intimate partner violence.

### Strength and limitation of the study

Our study exhibits both strengths and limitations. One notable advantage is the use of nationally representative datasets from 11 East African countries, allowing for the generalization of findings within the region. However, caution is necessary when comparing results from different surveys due to variations in data collection periods. Another strength is the substantial sample size of 59,000 participants. Nevertheless, the study is vulnerable to social desirability and recall bias as it relies on self-reported data. The study period, spanning from 2011 to 2018/19, may affect the applicability of the findings. Additionally, the surveys being cross-sectional in nature only enable the identification of associations, not causal relationships. For future research, we recommend collecting primary data and adopting case-control study designs to address the challenges of establishing causal relationships.

### Conclusion

The prevalence of intimate partner violence in East Africa is high as compared to the global prevalence 30%, which hinders the Sustainable Development Goals (SDGs), particularly goal 5, which seeks to achieve gender equality and empower all women and girls by 2030. Women being previously married and cohabitated, working, having a high number of children, rural

residents were positively associated with IPV and household and community wealth index and sex of household headed were negatively related with IPV in East Africa. Therefore, we recommend establishing effective health and legal response using an integrated policy approach and Special attention should be given to women who live rural and poorest to reduce IPV and to achieve Sustainable Development Goals (SDGs) goal 5. For future researcher we encourage to collect primary data and case control study design to solve cause effect dilemma.

## Acknowledgments

The authors thank the MEASURE DHS project for their support and free access to the original data.

## Author Contributions

**Conceptualization:** Zemenu Tadesse Tessema, Worku Misganaw Gebrie, Getayeneh Antehunegn Tesema, Tesfa Sewunet Alemneh, Achamyelch Birhanu Teshale, Yigizie Yeshaw, Adugnaw Zeleke Alem, Hiwotie Getaneh Ayalew, Alemneh Mekuriaw Liyew.

**Data curation:** Zemenu Tadesse Tessema, Worku Misganaw Gebrie, Getayeneh Antehunegn Tesema, Tesfa Sewunet Alemneh, Achamyelch Birhanu Teshale, Yigizie Yeshaw, Adugnaw Zeleke Alem, Hiwotie Getaneh Ayalew, Alemneh Mekuriaw Liyew.

**Formal analysis:** Zemenu Tadesse Tessema, Worku Misganaw Gebrie, Getayeneh Antehunegn Tesema, Tesfa Sewunet Alemneh, Achamyelch Birhanu Teshale, Yigizie Yeshaw, Adugnaw Zeleke Alem, Hiwotie Getaneh Ayalew, Alemneh Mekuriaw Liyew.

**Funding acquisition:** Zemenu Tadesse Tessema, Worku Misganaw Gebrie, Getayeneh Antehunegn Tesema, Tesfa Sewunet Alemneh, Achamyelch Birhanu Teshale, Yigizie Yeshaw, Adugnaw Zeleke Alem, Hiwotie Getaneh Ayalew, Alemneh Mekuriaw Liyew.

**Investigation:** Zemenu Tadesse Tessema, Worku Misganaw Gebrie, Getayeneh Antehunegn Tesema, Tesfa Sewunet Alemneh, Achamyelch Birhanu Teshale, Yigizie Yeshaw, Adugnaw Zeleke Alem, Hiwotie Getaneh Ayalew, Alemneh Mekuriaw Liyew.

**Methodology:** Zemenu Tadesse Tessema, Worku Misganaw Gebrie, Getayeneh Antehunegn Tesema, Tesfa Sewunet Alemneh, Achamyelch Birhanu Teshale, Yigizie Yeshaw, Adugnaw Zeleke Alem, Hiwotie Getaneh Ayalew, Alemneh Mekuriaw Liyew.

**Project administration:** Zemenu Tadesse Tessema, Worku Misganaw Gebrie, Getayeneh Antehunegn Tesema, Tesfa Sewunet Alemneh, Achamyelch Birhanu Teshale, Yigizie Yeshaw, Adugnaw Zeleke Alem, Hiwotie Getaneh Ayalew, Alemneh Mekuriaw Liyew.

**Resources:** Zemenu Tadesse Tessema, Worku Misganaw Gebrie, Getayeneh Antehunegn Tesema, Tesfa Sewunet Alemneh, Achamyelch Birhanu Teshale, Yigizie Yeshaw, Adugnaw Zeleke Alem, Hiwotie Getaneh Ayalew, Alemneh Mekuriaw Liyew.

**Software:** Zemenu Tadesse Tessema, Worku Misganaw Gebrie, Getayeneh Antehunegn Tesema, Tesfa Sewunet Alemneh, Achamyelch Birhanu Teshale, Yigizie Yeshaw, Adugnaw Zeleke Alem, Hiwotie Getaneh Ayalew, Alemneh Mekuriaw Liyew.

**Supervision:** Zemenu Tadesse Tessema, Worku Misganaw Gebrie, Getayeneh Antehunegn Tesema, Tesfa Sewunet Alemneh, Achamyelch Birhanu Teshale, Yigizie Yeshaw, Adugnaw Zeleke Alem, Hiwotie Getaneh Ayalew, Alemneh Mekuriaw Liyew.

**Validation:** Zemenu Tadesse Tessema, Worku Misganaw Gebrie, Getayeneh Antehunegn Tesema, Tesfa Sewunet Alemneh, Achamyehel Birhanu Teshale, Yigizie Yeshaw, Adugnaw Zeleke Alem, Hiwotie Getaneh Ayalew, Alemneh Mekuriaw Liyew.

**Visualization:** Zemenu Tadesse Tessema, Worku Misganaw Gebrie, Getayeneh Antehunegn Tesema, Tesfa Sewunet Alemneh, Achamyehel Birhanu Teshale, Yigizie Yeshaw, Adugnaw Zeleke Alem, Hiwotie Getaneh Ayalew, Alemneh Mekuriaw Liyew.

**Writing – original draft:** Zemenu Tadesse Tessema, Worku Misganaw Gebrie, Getayeneh Antehunegn Tesema, Tesfa Sewunet Alemneh, Achamyehel Birhanu Teshale, Yigizie Yeshaw, Adugnaw Zeleke Alem, Hiwotie Getaneh Ayalew, Alemneh Mekuriaw Liyew.

**Writing – review & editing:** Zemenu Tadesse Tessema, Worku Misganaw Gebrie, Getayeneh Antehunegn Tesema, Tesfa Sewunet Alemneh, Achamyehel Birhanu Teshale, Yigizie Yeshaw, Adugnaw Zeleke Alem, Hiwotie Getaneh Ayalew, Alemneh Mekuriaw Liyew.

## References

1. Buntin JT. Intimate Partner Violence. *Int Encycl Soc Behav Sci* Second Ed. 2015;685–8.
2. WHO. Violence against women [Internet]. 2021. Available from: [https://www.who.int/news-room/fact-sheets/detail/violence-against-women?\\_cf\\_chl\\_captcha\\_tk\\_\\_=pmd\\_UumrwMaumgdiNWjDhv6mfZESzR5ydp5eYacbyCnjexs-1629956995-0-gqNtZGzNAVujcnBszQl9](https://www.who.int/news-room/fact-sheets/detail/violence-against-women?_cf_chl_captcha_tk__=pmd_UumrwMaumgdiNWjDhv6mfZESzR5ydp5eYacbyCnjexs-1629956995-0-gqNtZGzNAVujcnBszQl9)
3. BANK W. Gender-Based Violence (Violence Against Women and Girls) [Internet]. 2019. Available from: <https://www.worldbank.org/en/topic/socialsustainability/brief/violence-against-women-and-girls>
4. Organization WH Global and regional estimates of violence against women: prevalence and health effects of intimate partner violence and non-partner sexual violence. World Health Organization; 2013.
5. Stöckl H, Hassan A, Ranganathan M, M. Hatcher A. Economic empowerment and intimate partner violence: a secondary data analysis of the cross-sectional Demographic Health Surveys in Sub-Saharan Africa. *BMC Womens Health*. 2021; 21(1):1–13.
6. Seid EA, Melese T, Alemu K. Spatial Distribution and Predictors of Domestic Violence Among Women Aged 15–49 in Ethiopia: Analysis of EDHS 2016 Dataset. 2020;
7. Iman'ishimwe Mukamana J, Machakanja P, Adjei NK. Trends in prevalence and correlates of intimate partner violence against women in Zimbabwe, 2005–2015. *BMC Int Heal Hum Rights*. 2020/01/22. 2020; 20(1):2. <https://doi.org/10.1186/s12914-019-0220-8> PMID: 31959182
8. Colorado-Yohar SM, Agudelo-Suárez AA, Huerta JM, Torres-Cantero AM. Intimate Partner Violence and Its Associated Factors in a Sample of Colombian Immigrant Population in Spain. *J Immigr Minor Heal*. 2015/12/17. 2016; 18(4):904–12.
9. Chernet AG, Cherie KT. Prevalence of intimate partner violence against women and associated factors in Ethiopia. *BMC Womens Heal*. 2020/02/08. 2020; 20(1):22. <https://doi.org/10.1186/s12905-020-0892-1> PMID: 32028961
10. Afiaz A, Biswas RK, Shamma R, Ananna N. Intimate partner violence (IPV) with miscarriages, stillbirths and abortions: Identifying vulnerable households for women in Bangladesh. *PLoS One*. 2020/07/30. 2020; 15(7):e0236670. <https://doi.org/10.1371/journal.pone.0236670> PMID: 32722708
11. Chai J, Fink G, Kaaya S, Danaei G, Fawzi W, Ezzati M, et al. Association between intimate partner violence and poor child growth: results from 42 demographic and health surveys. *Bull World Heal Organ*. 2016/05/06. 2016; 94(5):331–9. <https://doi.org/10.2471/BLT.15.152462> PMID: 27147763
12. Stake S, Ahmed S, Tol W, Ahmed S, Begum N, Khanam R, et al. Prevalence, associated factors, and disclosure of intimate partner violence among mothers in rural Bangladesh. *J Heal Popul Nutr*. 2020/12/09. 2020; 39(1):14. <https://doi.org/10.1186/s41043-020-00223-w> PMID: 33287907
13. Kadir Shahar H, Jafri F, Mohd Zulkefli NA, Ahmad N. Prevalence of intimate partner violence in Malaysia and its associated factors: a systematic review. *BMC Public Health*. 2020/10/17. 2020; 20(1):1550. <https://doi.org/10.1186/s12889-020-09587-4> PMID: 33059657
14. Alzahrani TA, Abaalkhail BA, Ramadan IK. Prevalence of intimate partner violence and its associated risk factors among Saudi female patients attending the primary healthcare centers in Western Saudi Arabia. *Saudi Med J*. 2016/01/08. 2016; 37(1):96–9. <https://doi.org/10.15537/smj.2016.1.13135> PMID: 26739983

15. Gubi D, Nansubuga E, Wandera SO. Correlates of intimate partner violence among married women in Uganda: a cross-sectional survey. *BMC Public Health*. 2020/06/27. 2020; 20(1):1008. <https://doi.org/10.1186/s12889-020-09123-4> PMID: 32586297
16. Lee BX, Kjaerulf F, Turner S, Cohen L, Donnelly PD, Muggah R, et al. Transforming our world: implementing the 2030 agenda through sustainable development goal indicators. *J Public Health Policy*. 2016; 37(1):13–31. <https://doi.org/10.1057/s41271-016-0002-7> PMID: 27638240
17. Corsi DJ, Neuman M, Finlay JE, Subramanian S V. Demographic and health surveys: a profile. *Int J Epidemiol*. 2012; 41(6):1602–13. <https://doi.org/10.1093/ije/dys184> PMID: 23148108
18. Demographic T, Program HS. Guide to DHS Statistics. Available from: [https://dhsprogram.com/data/dataset\\_admin/index.cfm](https://dhsprogram.com/data/dataset_admin/index.cfm)
19. Gelles RJ, Straus MA. Violence in the American family. *J Soc Issues*. 1979; 35(2):15–39.
20. Cools S, Kotsadam A. Resources and intimate partner violence in Sub-Saharan Africa. *World Dev*. 2017; 95:211–30.
21. Black E, Worth H, Clarke S, Obol JH, Akera P, Awor A, et al. Prevalence and correlates of intimate partner violence against women in conflict affected northern Uganda: A cross-sectional study. *Confl Health*. 2019; 13(1):1–10. <https://doi.org/10.1186/s13031-019-0219-8> PMID: 31384294
22. Murshid NS, Critelli FM. Empowerment and Intimate Partner Violence in Pakistan: Results From a Nationally Representative Survey. *J Interpers Violence*. 2018/01/04. 2020; 35(3–4):854–75. <https://doi.org/10.1177/0886260517690873> PMID: 29294654
23. Tiruye TY, Chojenta C, Harris ML, Holliday E, Loxton D. Intimate partner violence against women and its association with pregnancy loss in Ethiopia: evidence from a national survey. *BMC Womens Heal*. 2020/09/06. 2020; 20(1):192. <https://doi.org/10.1186/s12905-020-01028-z> PMID: 32887604
24. Ahinkorah BO, Dickson KS, Seidu A. Women decision-making capacity and intimate partner violence among women in sub-Saharan Africa. 2018;1–10.
25. Jabbi A, Ndow B, Senghore T, Sanyang E, Kargbo JC, Bass P. Prevalence and factors associated with intimate partner violence against women in The Gambia: a population-based analysis. *Women Heal*. 2020/05/19. 2020; 60(8):912–28. <https://doi.org/10.1080/03630242.2020.1767264> PMID: 32419660
26. Kpozehouen A, Paraïso NM, Ahanhanzo YG, Kliqpo E, Jérôme CS, Ouédraogo LT, et al. Perception of Beninese on intimate partner violence: evidence from 2011–2012 Benin demographic health survey. *BMC Womens Heal*. 2018/08/18. 2018; 18(1):140. <https://doi.org/10.1186/s12905-018-0633-x> PMID: 30115038
27. Acharya DR, Bell JS, Simkhada P, Van Teijlingen ER, Regmi PR. Women's autonomy in household decision-making: a demographic study in Nepal. *Reprod Health*. 2010; 7(1):1–12. <https://doi.org/10.1186/1742-4755-7-15> PMID: 20630107
28. Wong JYH, Choi AWM, Fong DYT, Choi EPH, Wong JKS, So FL, et al. A comparison of intimate partner violence and associated physical injuries between cohabitating and married women: A 5-year medical chart review. *BMC Public Health [Internet]*. 2016; 16(1):1–9. Available from: <https://doi.org/10.1186/s12889-016-3879-y> PMID: 27899112
29. Paper W, Papers D. [www.econstor.eu](http://www.econstor.eu). 2018;
30. Oluwole EO, Onwumelu NC, Okafor IP. Prevalence and determinants of intimate partner violence among adult women in an urban community in Lagos, Southwest Nigeria. *Pan Afr Med J*. 2020/11/24. 2020; 36:345. <https://doi.org/10.11604/pamj.2020.36.345.24402> PMID: 33224411
31. Peek-Asa C, Saftlas AF, Wallis AB, Harland K, Dickey P. Presence of children in the home and intimate partner violence among women seeking elective pregnancy termination. *PLoS One*. 2017; 12(10):1–12. <https://doi.org/10.1371/journal.pone.0186389> PMID: 29023582
32. Semahegn A, Mengistie B. Domestic violence against women and associated factors in Ethiopia; systematic review. *Reprod Heal*. 2015/09/01. 2015; 12:78.
33. Azene ZN, Yeshita HY, Mekonnen FA. Intimate partner violence and associated factors among pregnant women attending antenatal care service in Debre Markos town health facilities, Northwest Ethiopia. *PLoS One*. 2019/07/02. 2019; 14(7):e0218722. <https://doi.org/10.1371/journal.pone.0218722> PMID: 31260469
34. Memiah P, Ah Mu T, Prevot K, Cook CK, Mwangi MM, Mwangi EW, et al. The Prevalence of Intimate Partner Violence, Associated Risk Factors, and Other Moderating Effects: Findings From the Kenya National Health Demographic Survey. *J Interpers Violence*. 2018/10/13. 2021; 36(11–12):5297–317. <https://doi.org/10.1177/0886260518804177> PMID: 30311515
35. Abramsky T, Lees S, Stöckl H, Harvey S, Kapinga I, Ranganathan M, et al. Women's income and risk of intimate partner violence: Secondary findings from the MAISHA cluster randomised trial in North-Western Tanzania. *BMC Public Health*. 2019; 19(1):15–7.

36. Yoosefi Lebni J, Mohammadi Gharehghani MA, Soofizad G, Khosravi B, Ziapour A, Irandoost SF. Challenges and opportunities confronting female-headed households in Iran: A qualitative study. *BMC Womens Health*. 2020; 20(1):1–11.
37. Tun T, Ostergren PO. Spousal violence against women and its association with sociodemographic factors and husbands' controlling behaviour: the findings of Myanmar Demographic and Health Survey (2015–2016). *Glob Heal Action*. 2020/11/21. 2020; 13(1):1844975. <https://doi.org/10.1080/16549716.2020.1844975> PMID: [33215577](https://pubmed.ncbi.nlm.nih.gov/33215577/)
